# Supplementary material for: Histone H2AX Is Involved in FoxO3a-Mediated Transcriptional Responses to Ionizing Radiation to Maintain Genome Stability
Source: PubMed Central journal article supplement (PMC4691159; doi:10.3390/ijms161226216), 2015-12-16
Supplement: ijms-16-26216-s001.pdf [file ijms-16-26216-s001.pdf]

# Supplementary Material: Histone H2AX Is Involved in FoxO3a-Mediated Transcriptional Responses to Ionizing Radiation to Maintain Genome Stability

Stephane Tarrade, Tanya Bhardwaj, Matthew Flegal, Lindsey Bertrand, Ilya Velegzhaninov, Alexey Moskalev and Dmitry Klovov

Table S1. Details of five pentaplex qPCR assays used in this study.

| 5plex ID                             | Gene Name/ID <sup>a</sup>           | Sequence/Probe Type                  | T <sub>m</sub> (°C) | Validation Result |
|--------------------------------------|-------------------------------------|--------------------------------------|---------------------|-------------------|
| #1                                   | <i>CDKN1A</i> /<br>NM_007669        | For: 5'-ACCGTGGGTGTCAAAGCA-3'        | 67                  | Passed            |
|                                      |                                     | Rev: 5'-GTGCGGGCTAAGGGTAGA-3'        | 65                  |                   |
|                                      |                                     | Probe: FAM—BHQ1                      | -                   |                   |
|                                      | <i>SOD2</i> /<br>NM_013671          | 5'-TTAGTGGGTCTGACTCCAGCCC-3'         | 69                  | Passed            |
|                                      |                                     | For: 5'-CGCCTGCCATGAGTACCAT-3'       | 66                  |                   |
|                                      |                                     | Rev: 5'-CGAGGTCATCTTGCCAAACTTG-3'    | 67                  |                   |
|                                      |                                     | Probe: CAL Fluor Gold 540—BHQ1       | -                   |                   |
|                                      | <i>CAT</i> /<br>NM_009804           | 5'-ACTGAGTCTAATGTTTAGGCCTTCCAGTGT-3' | 70                  | Passed            |
|                                      |                                     | For: 5'-ACAACGCTGAGAAGCCTAAGA-3'     | 67                  |                   |
|                                      |                                     | Rev: 5'-GCTGAGCACCGGAGTTACAG-3'      | 67                  |                   |
|                                      | <i>GAPDH</i> /<br>NM_008084         | Probe: CAL Fluor Red 610—BHQ2        | -                   | Passed            |
|                                      |                                     | 5'-ACCTACACGCAGGCCGGCTCTC-3'         | 70                  |                   |
|                                      |                                     | For: 5'-GTGTCCGTCGTGGATCTGA-3'       | 67                  |                   |
|                                      | <i>ACTB</i> /<br>NM_007393          | Rev: 5'-CACCACCTTCTTGATGTCATCATAC-3' | 67                  | Passed            |
|                                      |                                     | Probe: Quasar 670—BHQ2               | -                   |                   |
| 5'-CGTGCCGCCTGGAGAAACCT-3'           |                                     | 70                                   |                     |                   |
| For: 5'-GACAGGATGCAGAAGGAGATTACTG-3' |                                     | 66                                   |                     |                   |
| <i>DDB2</i> /<br>NM_028119           | Rev: 5'-GCTCAGGAGGAGCAATGATC-3'     | 66                                   | Passed              |                   |
|                                      | Probe: Quasar 705—BHQ2              | -                                    |                     |                   |
|                                      | 5'-TGGCTCCTAGCACCATGAAGATCA-3'      | 70                                   |                     |                   |
|                                      | For: 5'-GGCCACAGCCTCCATAGATC-3'     | 66                                   |                     |                   |
| <i>BBC3</i> /<br>NM_010786           | Rev: 5'-GTGAGGCAGTGAGTAGAGGAA-3'    | 67                                   | Passed              |                   |
|                                      | Probe: FAM—BHQ1                     | -                                    |                     |                   |
|                                      | 5'-AGTGAAGATTTGGGACCTGCGCCAAA-3'    | 70                                   |                     |                   |
|                                      | For: 5'-TGCCTTAAAGCTTCAGAGACAAG-3'  | 66                                   |                     |                   |
| #2                                   | <i>PPARG</i> /<br>NM_011146         | Rev: 5'-CCCACCGCCTCCTATTCAA-3'       | 67                  | Failed, excluded  |
|                                      |                                     | Probe: CAL Fluor Gold 540—BHQ1       | -                   |                   |
|                                      |                                     | 5'-CAAGAACACTCCTCCCACGTGACA-3'       | 70                  |                   |
|                                      | <i>GAPDH</i> /<br>NM_008084         | For: 5'-CTCAGGCAGATCGTCACAGA-3'      | 66                  | Passed            |
| Rev: 5'-TCAGCGGGTGGGACTTTC-3'        |                                     | 66                                   |                     |                   |
| Probe: CAL Fluor Red 610—BHQ2        |                                     | -                                    |                     |                   |
| 5'-TGCAGCTACTGCATGTGATCAAGAA-3'      |                                     | 69                                   |                     |                   |
| <i>ACTB</i> /<br>NM_007393           | For: 5'-CCTGGAGAAACCTGCCAAGTATG-3'  | 67                                   | Passed              |                   |
|                                      | Rev: 5'-AGCCCAAGATGCCCTTCAG-3'      | 67                                   |                     |                   |
|                                      | Probe: Quasar 670—BHQ2              | -                                    |                     |                   |
|                                      | 5'-CAAGAAGGTGGTGAAGCAGGCATCT-3'     | 70                                   |                     |                   |
| #3                                   | <i>DDIT3</i> /<br>NM_007837         | For: 5'-GTGACGTTGACATCCGTAAAGAC-3'   | 66                  | Passed            |
|                                      |                                     | Rev: 5'-GCCTGGGTACATGGTGGTA-3'       | 66                  |                   |
|                                      |                                     | Probe: Quasar 705—BHQ2               | -                   |                   |
|                                      | <i>MDM2</i> /<br>NM_010786          | 5'-ATGCCAACACAGTGCTGTCTGGT-3'        | 70                  | Passed            |
| For: 5'-GAGCTGGAAGCCTGGTATGAG-3'     |                                     | 66                                   |                     |                   |
| Rev: 5'-GGACGCAGGGTCAAGAGTAG-3'      |                                     | 66                                   |                     |                   |
| <i>MDM2</i> /<br>NM_010786           | Probe: FAM—BHQ1                     | -                                    | Passed              |                   |
|                                      | 5'-TGCAGGAGGTCCTGTCTCAGAT-3'        | 70                                   |                     |                   |
|                                      | For: 5'-GTGGGCTGCAGAGAAGAC-3'       | 66                                   |                     |                   |
| <i>MDM2</i> /<br>NM_010786           | Rev: 5'-CATGCGTGCATCCATTTGAAGATC-3' | 66                                   | Passed              |                   |
|                                      | Probe: CAL Fluor Gold 540—BHQ1      | -                                    |                     |                   |
|                                      | 5'-CAGCCAGTAAAGGCACCTGCTGT-3'       | 70                                   |                     |                   |

Table S1. Cont.

| 5plex ID            | Gene Name/ID <sup>a</sup>          | Sequence/Probe Type                | T <sub>m</sub> (°C) | Validation Result |
|---------------------|------------------------------------|------------------------------------|---------------------|-------------------|
| #3                  | TNFSF10/<br>NM_009425              | For: 5'-AGGCAACTGGAGCTAAAGACAAG-3' | 66                  | Failed, excluded  |
|                     |                                    | Rev: 5'-CCACCCTGTTCTCACAGATTC-3'   | 67                  |                   |
|                     |                                    | Probe: CAL Fluor Red 610—BHQ2      | -                   |                   |
|                     | GAPDH/<br>NM_008084                | 5'-TAAGCTGGTGTACCCCGATGGAGC-3'     | 70                  | Passed            |
|                     |                                    | For: 5'-CCTGGAGAAACCTGCCAAGTATG-3' | 67                  |                   |
|                     |                                    | Rev: 5'-AGCCCAAGATGCCCTTCAG-3'     | 67                  |                   |
|                     | ACTB/<br>NM_007393                 | Probe: Quasar 670-BHQ2             | -                   | Passed            |
|                     |                                    | 5'-CAAGAAGGTGGTGAAGCAGGCATCT-3'    | 70                  |                   |
|                     |                                    | For: 5'-GTGACGTTGACATCCGTAAGAC-3'  | 66                  |                   |
| #4                  | FOXO3A/<br>NM_019740               | Rev: 5'-GCTCAGGAGGAGCAATGATC-3'    | 66                  | Passed            |
|                     |                                    | Probe: Quasar 705—BHQ2             | -                   |                   |
|                     |                                    | 5'-AAGACCTACAGAGAAAACCCCTTGCCAA-3' | 69                  |                   |
|                     | GADD45α/<br>NM_007836              | For: 5'-GCAAAGCAGACCCTCAAACCTG-3'  | 66                  | Passed            |
|                     |                                    | Rev: 5'-CGGCGTGGGAGTCTCAAAG-3'     | 66                  |                   |
|                     |                                    | Probe: CAL Fluor Gold 540—BHQ1     | -                   |                   |
|                     | DDB1/<br>NM_015735                 | 5'-TGGAAGGATCCTGCCTAAGTCAACTTA-3'  | 68                  | Passed            |
|                     |                                    | For: 5'-CACACTGAGCGAAAGACAGAAC-3'  | 66                  |                   |
|                     |                                    | Rev: 5'-GGCGCTGATATCTAGGAAAC-3'    | 65                  |                   |
| GAPDH/<br>NM_008084 | Probe: CAL Fluor Red 610—BHQ2      | -                                  | Passed              |                   |
|                     | 5'-CAGCCACAGGCTTCATCGATGGT-3'      | 70                                 |                     |                   |
|                     | For: 5'-GCCAAGGTCATCCATGACAAC-3'   | 67                                 |                     |                   |
| ACTB/<br>NM_007393  | Rev: 5'-TCACGCCACAGCTTCCAG-3'      | 67                                 | Passed              |                   |
|                     | Probe: Quasar 670—BHQ2             | -                                  |                     |                   |
|                     | 5'-TGCTCTGGCTCCTAGCACCA-3'         | 69                                 |                     |                   |
| #5                  | HSPA1B/<br>NM_010478               | For: 5'-GACAGGATGCAGAAGGAGATTAC-3' | 66                  | Passed            |
|                     |                                    | Rev: 5'-GCTCAGGAGGAGCAATGATC-3'    | 66                  |                   |
|                     |                                    | Probe: Quasar 705—BHQ2             | -                   |                   |
|                     | G6PC/<br>NM_008061                 | 5'-CTGCTGGCTCTCCCGGTGTG-3'         | 70                  | Failed, excluded  |
|                     |                                    | For: 5'-GCAAGCCCAGGCTAGAGATC-3'    | 67                  |                   |
|                     |                                    | Rev: 5'-TTTCCCAGCCGGAAGATTC-3'     | 66                  |                   |
|                     | BCL2L11/<br>NM_207681              | Probe: CAL Fluor Gold 540—BHQ1     | -                   | Passed            |
|                     |                                    | 5'-TGAGAATGCTCTTGCGGTGCA-3'        | 70                  |                   |
|                     |                                    | For: 5'-TTGCCAAGGCCACTTGTG-3'      | 66                  |                   |
| GAPDH/<br>NM_008084 | Rev: 5'-GGGAGCCGAATGGTATAGGTAAG-3' | 66                                 | Passed              |                   |
|                     | Probe: CAL Fluor Red 610—BHQ2      | -                                  |                     |                   |
|                     | 5'-CAGGACACTCGCTGGCTACCG-3'        | 70                                 |                     |                   |
| ACTB/<br>NM_007393  | For: 5'-CCTGGAGAAACCTGCCAAGTATG-3' | 66                                 | Passed              |                   |
|                     | Rev: 5'-GCCCAAGATGCCCTTCAGT-3'     | 67                                 |                     |                   |
|                     | Probe: Quasar 670—BHQ2             | -                                  |                     |                   |
| ACTB/<br>NM_007393  | 5'-CAAGAAGGTGGTGAAGCAGGCATCT-3'    | 70                                 | Passed              |                   |
|                     | For: 5'-GTGACGTTGACATCCGTAAGAC-3'  | 66                                 |                     |                   |
|                     | Rev: 5'-GCTCAGGAGGAGCAATGATC-3'    | 66                                 |                     |                   |
| ACTB/<br>NM_007393  | Probe: Quasar 705—BHQ2             | -                                  | Passed              |                   |
|                     | 5'-ATGCCAACACAGTGCTGTCTGGTG-3'     | 70                                 |                     |                   |
|                     | For: 5'-GCAAAGCAGACCCTCAAACCTG-3'  | 66                                 |                     |                   |

<sup>a</sup> NCBI RefSeq accession number. # designates the number of an assay. Abbreviations: BHQ, black hole quencher; FAM, 5-carboxyfluorescein.

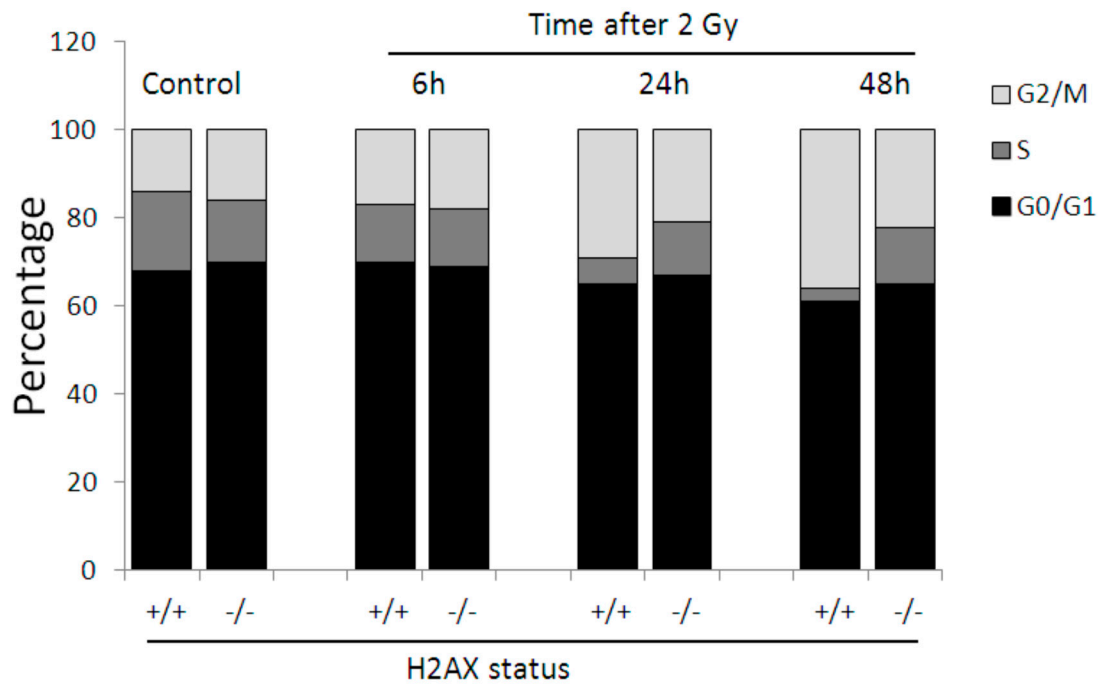

**Figure S1.** Distribution of cell cycle phases in MEF *H2AX*<sup>+/+</sup> vs. MEF *H2AX*<sup>-/-</sup> cells under control and irradiated condition. Subconfluent cells were sham- or  $\gamma$ -irradiated with 2 Gy followed by fixation in 70% methanol at indicated time points and stored at -20 °C. Fixed cells were subsequently rehydrated, stained with DAPI (4',6-diamidino-2-phenylindole) and analyzed using the Cell Lab Quanta SC flow cytometer (Beckman Coulter). DAPI (DNA content) fluorescence were triggered by an mercury arc lamp and detected and measured in the FL1 (525BP) channel. Readings from at least 5000 cells were collected and analyzed by Quanta Analysis software (Beckman Coulter) to calculate fraction of cells in various cell cycle phases. Data are the means of two independent experiments.
